# Supplementary material
Source: ML conference proceedings conference paper supplement (https://openaccess.thecvf.com/content/ICCV_2019/html/Chen_Mixed_High-Order_Attention_ICCV_2019_paper.html)
Supplement: Supplementary file 1 [file Chen_Mixed_High-Order_Attention_ICCV_2019_supplemental.pdf]

# Supplementary File

Binghui Chen, Weihong Deng\*, Jiani Hu  
Beijing University of Posts and Telecommunications

chenbinghui@bupt.edu.cn, whdeng@bupt.edu.cn, jnhu@bupt.edu.cn

## 1. Proof for matrixes integration

$$\mathbf{a}(\mathbf{x}) = \mathbf{P}^{1T}(\mathbf{w}^1 \odot \mathbf{x}) + \sum_{r=2}^R \mathbf{P}^{rT}(\boldsymbol{\alpha}^r \odot \mathbf{z}^r) \quad (1)$$

$$\mathbf{a}(\mathbf{x}) = \widehat{\mathbf{w}}^{1T} \mathbf{x} + \sum_{r=2}^R \widehat{\boldsymbol{\alpha}}^{rT} \mathbf{z}^r \quad (2)$$

As described in paper, Eq.1 is integrated into Eq.2 via matrix integration. Below, we will provide a simple proof.

*Proof.* Now, we consider integrate  $\{\mathbf{P}^1, \mathbf{w}^1\}$  into a new single matrix  $\widehat{\mathbf{w}}^1$ . We have  $\mathbf{P}^1 \in \mathbb{R}^{C \times C}$ ,  $\mathbf{w}^1 \in \mathbb{R}^C$ ,  $\mathbf{x} \in \mathbb{R}^C$ :

$$\mathbf{P}^1 = \begin{bmatrix} p_{1,1} & \cdots & p_{1,c} \\ \vdots & & \vdots \\ p_{c,1} & \cdots & p_{c,c} \end{bmatrix}, \mathbf{w}^1 = \begin{bmatrix} w_1 \\ \vdots \\ w_c \end{bmatrix}, \mathbf{x} = \begin{bmatrix} x_1 \\ \vdots \\ x_c \end{bmatrix}$$

computing  $\mathbf{P}^{1T}(\mathbf{w}^1 \odot \mathbf{x})$ , we will have:

$$\mathbf{P}^{1T}(\mathbf{w}^1 \odot \mathbf{x}) = \begin{bmatrix} p_{1,1}w_1x_1 + \cdots + p_{c,1}w_cx_c \\ \vdots \\ p_{1,c}w_1x_1 + \cdots + p_{c,c}w_cx_c \end{bmatrix} \quad (3)$$

since  $p_{i,j}$  and  $w_i$  are both learnable parameters, let  $\widehat{w}_{i,j}^1 = p_{i,j}w_i$ , we will have a new matrix  $\widehat{\mathbf{w}}^1 \in \mathbb{R}^{C \times C}$ , where the  $i$ -th row,  $j$ -th column value is  $\widehat{w}_{i,j}^1$ . Then,  $\mathbf{P}^{1T}(\mathbf{w}^1 \odot \mathbf{x}) = \widehat{\mathbf{w}}^{1T} \mathbf{x}$ .

Learning the term  $p_{i,j}w_i$  is equivalent to learning a single  $\widehat{w}_{i,j}^1$ , as a result, we can integrate  $\{\mathbf{P}^1, \mathbf{w}^1\}$  into the single matrix  $\widehat{\mathbf{w}}^1$ . Similarly,  $\{\mathbf{P}^r, \boldsymbol{\alpha}^r\}$  can be integrated into  $\widehat{\boldsymbol{\alpha}}^r$ .  $\square$

## 2. Ablation study on $\lambda$

To show the effect of hyper-parameter  $\lambda$ , we conduct experiments as in Tab.1 and Tab.2. One can observe that if using an appropriate value of  $\lambda$ , the performances of MHN-6(IDE/PCB) can be the best. And we set  $\lambda$  to be 1 and 1.4 for MHN-6(IDE) and MHN-6(PCB) respectively throughout our experiments.

\*Corresponding author

|                 | DukeMTMC-ReID |             | Market-1501 |             |
|-----------------|---------------|-------------|-------------|-------------|
|                 | R-1           | mAP         | R-1         | mAP         |
| $\lambda = 0$   | 85.5          | 70.8        | 91.8        | 80.0        |
| $\lambda = 1$   | 87.1          | 75.2        | 93.5        | 83.4        |
| $\lambda = 1.4$ | <b>87.5</b>   | <b>75.2</b> | <b>93.6</b> | <b>83.6</b> |

Table 1. Experiments with MHN-6 (IDE).

|                 | DukeMTMC-ReID |             | Market-1501 |             |
|-----------------|---------------|-------------|-------------|-------------|
|                 | R-1           | mAP         | R-1         | mAP         |
| $\lambda = 0$   | 87.7          | 75.4        | 93.9        | 83.2        |
| $\lambda = 1.4$ | 88.7          | 76.5        | 94.7        | 84.4        |
| $\lambda = 2$   | <b>89.1</b>   | <b>77.1</b> | <b>95.1</b> | <b>85.0</b> |

Table 2. Experiments with MHN-6 (PCB).

## 3. Layer name

In Pytorch<sup>1</sup>, the ResNet50 is composed of *conv1-bn1-relu-maxpool-layer1-layer2-layer3-layer4-avg*, where *layerX* contains several Res-blocks. In our MHN, the HOA modules are placed after *layer2*.

## References

<sup>1</sup>[https://github.com/layumi/Person\\_reID\\_baseline\\_pytorch](https://github.com/layumi/Person_reID_baseline_pytorch)
